# Supplementary material for: Guided morphogenesis through optogenetic activation of Rho signalling during early Drosophila embryogenesis
Source: PubMed Central journal article supplement (PMC6006163; doi:10.1038/s41467-018-04754-z), 2018-06-18
Supplement: 41467_2018_4754_MOESM1_ESM.pdf [file 41467_2018_4754_MOESM1_ESM.pdf]

**Guided morphogenesis through optogenetic activation of Rho signaling  
during early *Drosophila* embryogenesis**

Izquierdo et al.

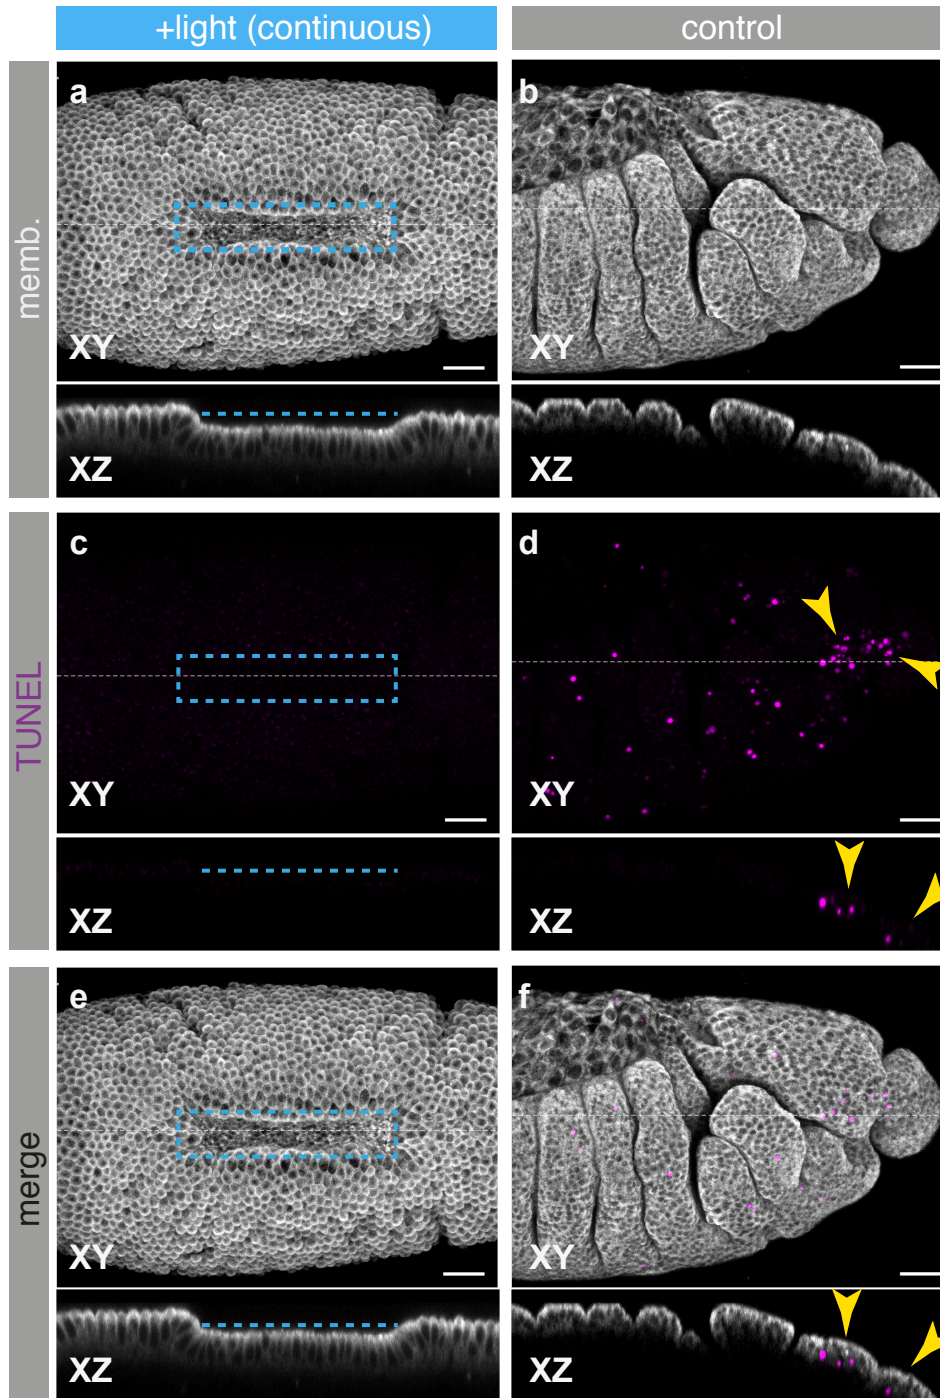

### Supplementary Figure 1: Optogenetic activation and apoptosis

**(a-f)** Confocal images of representative embryos (N=5) co-expressing CIBN::pmGFP and RhoGEF2-CRY2::mCherry double-labeled with TUNEL and antibody staining. Embryos were pooled together, dechorinated, fixed and stained with anti-GFP to label the plasma membrane and fluorescein-dUTP to label apoptotic cells. All panels show both top and cross-sectional views of the embryos. **(a,c,e)** A gastrulating embryo (stage 5) was locally photo-activated to induce an invagination. The blue dotted rectangle indicates the site of photo-activation. **(a)** Anti-GFP staining labeling the cell membranes. **(c)** TUNEL staining does not detect any apoptotic cells. **(e)** Merge of membrane and TUNEL labeling. **(b,d,f)** A control non photo-activated stage 14 embryo, yellow arrowheads indicate positively labeled apoptotic cells. **(b)** Anti-GFP stain labeling the cell membranes. **(d)** TUNEL staining identifies several apoptotic cells. **(f)** Merge of membrane and TUNEL staining. Scale bars, 20  $\mu\text{m}$ .

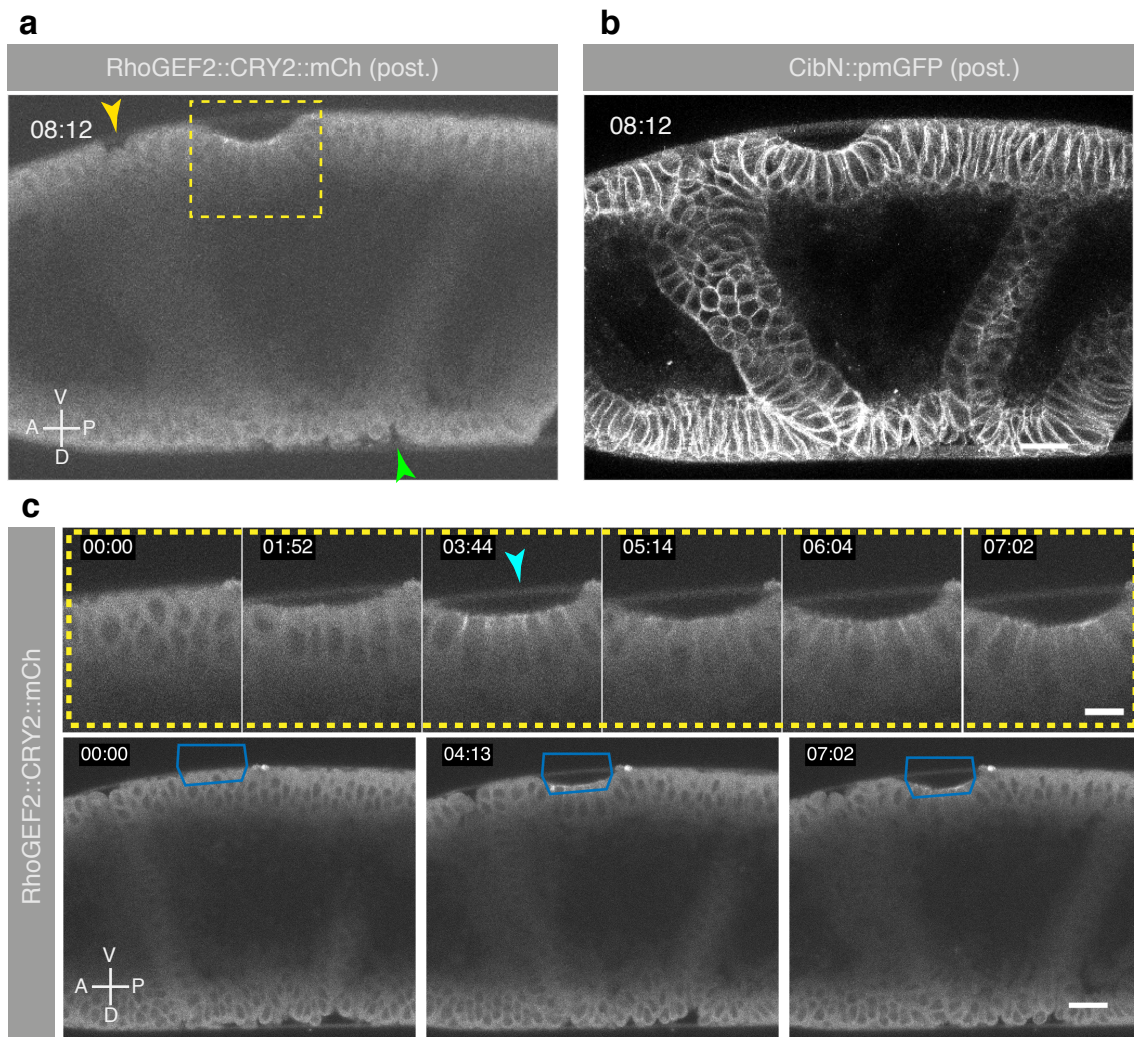

### Supplementary Figure 2: Induction of an ectopic invagination in the late gastrulating embryo

**(a-c)** A representative embryo (N=4) of stage 7-8 co-expressing CIBN::pmGFP and RhoGEF2-CRY2::mCherry. A region encompassing ~7 cells in the ventral side of the embryo was photo-activated in an optical cross-section for a total of  $5\mu\text{m}$  from the apical-most plane (blue box in (c)). Sustained photo-activation was alternated with mCherry excitation, the protocol lasted for ~8 min. after which both mCherry and GFP signals were recorded for the whole embryo (a-b). **(a)** Confocal still frame showing RhoGEF2-CRY2::mCherry after photo-activation. Arrowheads indicate embryonic stage 8 morphogenetic landmarks, in yellow the cephalic furrow, in green the posterior dorsal fold. Detailed time-course recordings of the region enclosed the dashed yellow box are showed in (c). **(b)** Confocal still frame showing membrane outlines (CIBN::pmGFP) after photo-activation. Scale bar is  $20\mu\text{m}$ . **(c)** Confocal still frames from a time-lapse recording of the embryo in (a-b) for which a detailed view (top) and a view of the whole embryo are shown. Arrowhead in cyan indicated the vitelline membrane. The blue box indicates the area of photo-activation. Scale bars are  $10\mu\text{m}$  (top) and  $20\mu\text{m}$  (bottom).
